# Supplementary material for: S100B chaperone multimers suppress the formation of oligomers during Aβ42 aggregation
Source: Front Neurosci. 2023 Mar 21;17:1162741. doi: 10.3389/fnins.2023.1162741 (PMC10070764; doi:10.3389/fnins.2023.1162741)
Supplement: Supplementary file 2 [file Table_1.XLSX]

## Sheet: Figure 4
	Thioflavin-T traces
	S100B-Ca2+ dimer:Abβ2 molar ratios																								Apo-S100B tetramer:Aβ42 molar ratios
	0		0		0		2.5		2.5		2.5		4.2		4.2		4.2		5.8		5.8		5.8		0		0		0		0.1		0.1		0.1		0.25		0.25		0.25		0.5		0.5		0.5
	Time (h)	Fluor.	Time (h)	Fluor.	Time (h)	Fluor.	Time (h)	Fluor.	Time (h)	Fluor.	Time (h)	Fluor.	Time (h)	Fluor.	Time (h)	Fluor.	Time (h)	Fluor.	Time (h)	Fluor.	Time (h)	Fluor.	Time (h)	Fluor.	Time (h)	Fluor.	Time (h)	Fluor.	Time (h)	Fluor.	Time (h)	Fluor.	Time (h)	Fluor.	Time (h)	Fluor.	Time (h)	Fluor.	Time (h)	Fluor.	Time (h)	Fluor.	Time (h)	Fluor.	Time (h)	Fluor.	Time (h)	Fluor.
	0.55556	0	0.55556	0	0.55556	0	0.44444	0	0.44444	0	0.44444	0	0.66667	0	0.66667	0	0.66667	0	0.88889	0	0.66667	0	0.66667	0	0.55556	0	0.55556	0	0.55556	0	0.55556	0	0.55556	0	0.55556	0	0.55556	0	0.55556	0	0.55556	0	0.55556	0	0.55556	0	0.55556	0
	0.66667	-28	0.66667	-18	0.66667	-37	0.55556	-156	0.55556	25	0.55556	-43	0.77778	46	0.77778	-8	0.77778	70	1	27	0.77778	36	0.77778	33	0.66667	-34	0.66667	7	0.66667	-47	0.66667	0	0.66667	-15	0.66667	-11	0.66667	-26	0.66667	-40	0.66667	-5	0.66667	41	0.66667	-7	0.66667	-12
	0.77778	22	0.77778	-23	0.77778	-17	0.66667	-134	0.66667	9	0.66667	9	0.88889	65	0.88889	39	0.88889	98	1.11111	35	0.88889	14	0.88889	87	0.77778	-10	0.77778	-16	0.77778	-57	0.77778	14	0.77778	-23	0.77778	-18	0.77778	-37	0.77778	-33	0.77778	-10	0.77778	27	0.77778	15	0.77778	5
	0.88889	0	0.88889	-26	0.88889	-2	0.77778	-123	0.77778	33	0.77778	33	1	63	1	116	1	86	1.22222	79	1	26	1	58	0.88889	-3	0.88889	-20	0.88889	-60	0.88889	-16	0.88889	-17	0.88889	-36	0.88889	-56	0.88889	14	0.88889	-9	0.88889	48	0.88889	17	0.88889	3
	1	-32	1	-29	1	64	0.88889	-70	0.88889	68	0.88889	8	1.11111	129	1.11111	135	1.11111	111	1.33333	146	1.11111	40	1.11111	103	1	-47	1	-9	1	-11	1	34	1	-5	1	16	1	-45	1	-22	1	-18	1	10	1	5	1	26
	1.11111	-4	1.11111	87	1.11111	104	1	-18	1	129	1	112	1.22222	107	1.22222	161	1.22222	164	1.44444	103	1.22222	90	1.22222	125	1.11111	37	1.11111	59	1.11111	64	1.11111	52	1.11111	31	1.11111	19	1.11111	-65	1.11111	-14	1.11111	25	1.11111	1	1.11111	26	1.11111	-5
	1.22222	78	1.22222	181	1.22222	255	1.11111	99	1.11111	248	1.11111	243	1.33333	273	1.33333	248	1.33333	226	1.55556	147	1.33333	112	1.33333	195	1.22222	76	1.22222	170	1.22222	163	1.22222	66	1.22222	48	1.22222	18	1.22222	-54	1.22222	36	1.22222	85	1.22222	23	1.22222	6	1.22222	22
	1.33333	164	1.33333	308	1.33333	435	1.22222	352	1.22222	518	1.22222	513	1.44444	320	1.44444	394	1.44444	316	1.66667	218	1.44444	153	1.44444	163	1.33333	177	1.33333	275	1.33333	240	1.33333	106	1.33333	127	1.33333	94	1.33333	-19	1.33333	20	1.33333	120	1.33333	-8	1.33333	2	1.33333	44
	1.44444	218	1.44444	478	1.44444	605	1.33333	684	1.33333	884	1.33333	871	1.55556	449	1.55556	546	1.55556	340	1.77778	254	1.55556	188	1.55556	206	1.44444	356	1.44444	470	1.44444	439	1.44444	233	1.44444	217	1.44444	203	1.44444	-18	1.44444	64	1.44444	212	1.44444	-5	1.44444	-18	1.44444	101
	1.55556	391	1.55556	686	1.55556	840	1.44444	1113	1.44444	1379	1.44444	1364	1.66667	659	1.66667	768	1.66667	456	1.88889	332	1.66667	221	1.66667	252	1.55556	553	1.55556	700	1.55556	699	1.55556	266	1.55556	296	1.55556	245	1.55556	31	1.55556	102	1.55556	269	1.55556	-11	1.55556	-19	1.55556	133
	1.66667	601	1.66667	909	1.66667	1099	1.55556	1608	1.55556	1905	1.55556	1860	1.77778	916	1.77778	1077	1.77778	638	2	416	1.77778	310	1.77778	325	1.66667	739	1.66667	938	1.66667	980	1.66667	433	1.66667	451	1.66667	481	1.66667	91	1.66667	181	1.66667	370	1.66667	4	1.66667	2	1.66667	197
	1.77778	903	1.77778	1153	1.77778	1364	1.66667	2176	1.66667	2422	1.66667	2453	1.88889	1267	1.88889	1458	1.88889	870	2.11111	551	1.88889	455	1.88889	415	1.77778	1012	1.77778	1208	1.77778	1243	1.77778	595	1.77778	640	1.77778	579	1.77778	166	1.77778	296	1.77778	500	1.77778	39	1.77778	-9	1.77778	217
	1.88889	1186	1.88889	1425	1.88889	1689	1.77778	2603	1.77778	2816	1.77778	2852	2	1567	2	1783	2	1112	2.22222	661	2	515	2	573	1.88889	1273	1.88889	1402	1.88889	1554	1.88889	734	1.88889	815	1.88889	760	1.88889	205	1.88889	403	1.88889	612	1.88889	0	1.88889	-14	1.88889	338
	2	1662	2	1710	2	2032	1.88889	2962	1.88889	3219	1.88889	3207	2.11111	1858	2.11111	2189	2.11111	1460	2.33333	823	2.11111	705	2.11111	695	2	1465	2	1750	2	1841	2	933	2	988	2	913	2	397	2	525	2	809	2	24	2	13	2	397
	2.11111	2219	2.11111	2131	2.11111	2513	2	3164	2	3474	2	3479	2.22222	2098	2.22222	2501	2.22222	1763	2.44444	1127	2.22222	920	2.22222	829	2.11111	1671	2.11111	1947	2.11111	2060	2.11111	1126	2.11111	1255	2.11111	1111	2.11111	506	2.11111	680	2.11111	964	2.11111	27	2.11111	40	2.11111	522
	2.22222	2725	2.22222	2553	2.22222	2892	2.11111	3366	2.11111	3755	2.11111	3677	2.33333	2368	2.33333	2793	2.33333	2059	2.55556	1331	2.33333	1048	2.33333	1033	2.22222	1917	2.22222	2114	2.22222	2189	2.22222	1315	2.22222	1353	2.22222	1306	2.22222	645	2.22222	794	2.22222	1061	2.22222	71	2.22222	106	2.22222	624
	2.33333	3073	2.33333	2972	2.33333	3097	2.22222	3554	2.22222	3842	2.22222	3818	2.44444	2602	2.44444	3042	2.44444	2396	2.66667	1498	2.44444	1263	2.44444	1229	2.33333	2071	2.33333	2221	2.33333	2330	2.33333	1488	2.33333	1540	2.33333	1507	2.33333	758	2.33333	981	2.33333	1257	2.33333	83	2.33333	136	2.33333	686
	2.44444	3264	2.44444	3168	2.44444	3294	2.33333	3638	2.33333	4092	2.33333	3956	2.55556	2739	2.55556	3194	2.55556	2691	2.77778	1705	2.55556	1460	2.55556	1433	2.44444	2106	2.44444	2384	2.44444	2387	2.44444	1651	2.44444	1749	2.44444	1701	2.44444	902	2.44444	1105	2.44444	1430	2.44444	175	2.44444	180	2.44444	788
	2.55556	3354	2.55556	3343	2.55556	3361	2.44444	3742	2.44444	4111	2.44444	4080	2.66667	2969	2.66667	3284	2.66667	2969	2.88889	1903	2.66667	1717	2.66667	1631	2.55556	2185	2.55556	2437	2.55556	2512	2.55556	1876	2.55556	1904	2.55556	1961	2.55556	1015	2.55556	1276	2.55556	1584	2.55556	191	2.55556	373	2.55556	917
	2.66667	3431	2.66667	3441	2.66667	3425	2.55556	3832	2.55556	4169	2.55556	4149	2.77778	3003	2.77778	3535	2.77778	3181	3	2128	2.77778	2018	2.77778	1845	2.66667	2288	2.66667	2530	2.66667	2571	2.66667	2011	2.66667	2068	2.66667	2154	2.66667	1162	2.66667	1450	2.66667	1727	2.66667	262	2.66667	446	2.66667	1050
	2.77778	3515	2.77778	3504	2.77778	3525	2.66667	3885	2.66667	4282	2.66667	4218	2.88889	3254	2.88889	3603	2.88889	3420	3.11111	2290	2.88889	2171	2.88889	2062	2.77778	2374	2.77778	2588	2.77778	2649	2.77778	2240	2.77778	2249	2.77778	2308	2.77778	1262	2.77778	1593	2.77778	1845	2.77778	335	2.77778	490	2.77778	1193
	2.88889	3541	2.88889	3526	2.88889	3578	2.77778	3964	2.77778	4324	2.77778	4240	3	3227	3	3656	3	3563	3.22222	2481	3	2356	3	2249	2.88889	2426	2.88889	2602	2.88889	2736	2.88889	2321	2.88889	2431	2.88889	2417	2.88889	1401	2.88889	1691	2.88889	2061	2.88889	402	2.88889	578	2.88889	1244
	3	3577	3	3632	3	3595	2.88889	4039	2.88889	4485	2.88889	4268	3.11111	3394	3.11111	3742	3.11111	3794	3.33333	2607	3.11111	2566	3.11111	2461	3	2479	3	2653	3	2701	3	2419	3	2541	3	2479	3	1520	3	1856	3	2181	3	463	3	675	3	1474
	3.11111	3574	3.11111	3719	3.11111	3593	3	4053	3	4443	3	4401	3.22222	3404	3.22222	3815	3.22222	3868	3.44444	2739	3.22222	2705	3.22222	2603	3.11111	2550	3.11111	2726	3.11111	2756	3.11111	2607	3.11111	2574	3.11111	2622	3.11111	1672	3.11111	1991	3.11111	2318	3.11111	553	3.11111	780	3.11111	1563
	3.22222	3630	3.22222	3761	3.22222	3658	3.11111	4108	3.11111	4488	3.11111	4418	3.33333	3484	3.33333	3952	3.33333	3974	3.55556	2819	3.33333	2881	3.33333	2730	3.22222	2598	3.22222	2782	3.22222	2728	3.22222	2675	3.22222	2649	3.22222	2655	3.22222	1790	3.22222	2108	3.22222	2394	3.22222	640	3.22222	855	3.22222	1774
	3.33333	3589	3.33333	3695	3.33333	3646	3.22222	4148	3.22222	4556	3.22222	4452	3.44444	3551	3.44444	3947	3.44444	4132	3.66667	2944	3.44444	3018	3.44444	2818	3.33333	2633	3.33333	2801	3.33333	2820	3.33333	2761	3.33333	2749	3.33333	2701	3.33333	1905	3.33333	2245	3.33333	2609	3.33333	735	3.33333	967	3.33333	1860
	3.44444	3649	3.44444	3733	3.44444	3631	3.33333	4145	3.33333	4568	3.33333	4453	3.55556	3650	3.55556	4091	3.55556	4170	3.77778	3062	3.55556	3103	3.55556	2999	3.44444	2695	3.44444	2901	3.44444	2874	3.44444	2831	3.44444	2788	3.44444	2812	3.44444	2006	3.44444	2345	3.44444	2628	3.44444	841	3.44444	1070	3.44444	1988
	3.55556	3714	3.55556	3821	3.55556	3707	3.44444	4162	3.44444	4577	3.44444	4585	3.66667	3740	3.66667	4115	3.66667	4241	3.88889	3168	3.66667	3118	3.66667	3112	3.55556	2710	3.55556	2814	3.55556	2860	3.55556	2918	3.55556	2897	3.55556	2828	3.55556	2103	3.55556	2469	3.55556	2710	3.55556	929	3.55556	1178	3.55556	2082
	3.66667	3666	3.66667	3833	3.66667	3667	3.55556	4228	3.55556	4596	3.55556	4539	3.77778	3739	3.77778	4080	3.77778	4426	4	3265	3.77778	3238	3.77778	3240	3.66667	2738	3.66667	2880	3.66667	2881	3.66667	3001	3.66667	2924	3.66667	2822	3.66667	2183	3.66667	2503	3.66667	2888	3.66667	1060	3.66667	1231	3.66667	2216
	3.77778	3667	3.77778	3787	3.77778	3733	3.66667	4292	3.66667	4666	3.66667	4641	3.88889	3768	3.88889	4187	3.88889	4365	4.11111	3334	3.88889	3297	3.88889	3363	3.77778	2755	3.77778	2946	3.77778	2847	3.77778	3006	3.77778	2979	3.77778	2882	3.77778	2302	3.77778	2655	3.77778	2862	3.77778	1148	3.77778	1370	3.77778	2313
							3.77778	4335	3.77778	4660	3.77778	4678	4	3758	4	4192	4	4530	4.22222	3392	4	3398	4	3437	3.88889	2675	3.88889	2908	3.88889	2883	3.88889	3031	3.88889	2950	3.88889	2888	3.88889	2346	3.88889	2708	3.88889	2998	3.88889	1296	3.88889	1514	3.88889	2407
							3.88889	4339	3.88889	4686	3.88889	4738	4.11111	3700	4.11111	4226	4.11111	4500	4.33333	3496	4.11111	3433	4.11111	3400	4	2781	4	2901	4	2928	4	3082	4	3044	4	2921	4	2455	4	2773	4	3007	4	1395	4	1697	4	2525
							4	4322	4	4701	4	4727	4.22222	3856	4.22222	4229	4.22222	4584	4.44444	3590	4.22222	3572	4.22222	3562	4.11111	2729	4.11111	2961	4.11111	2890	4.11111	3130	4.11111	3013	4.11111	2936	4.11111	2504	4.11111	2820	4.11111	3104	4.11111	1516	4.11111	1782	4.11111	2641
							4.11111	4374	4.11111	4769	4.11111	4684	4.33333	3847	4.33333	4326	4.33333	4664	4.55556	3590	4.33333	3659	4.33333	3605	4.22222	2769	4.22222	2923	4.22222	2922	4.22222	3134	4.22222	3081	4.22222	2949	4.22222	2603	4.22222	2865	4.22222	3205	4.22222	1630	4.22222	1955	4.22222	2799
							4.22222	4451	4.22222	4793	4.22222	4825	4.44444	3858	4.44444	4334	4.44444	4686	4.66667	3638	4.44444	3657	4.44444	3594	4.33333	2831	4.33333	3012	4.33333	2964	4.33333	3195	4.33333	3096	4.33333	3002	4.33333	2633	4.33333	2989	4.33333	3260	4.33333	1733	4.33333	2076	4.33333	2837
													4.55556	3853	4.55556	4374	4.55556	4737	4.77778	3682	4.55556	3726	4.55556	3650	4.44444	2818	4.44444	2974	4.44444	2954	4.44444	3172	4.44444	3131	4.44444	2973	4.44444	2716	4.44444	3034	4.44444	3331	4.44444	1816	4.44444	2240	4.44444	2912
													4.66667	3927	4.66667	4414	4.66667	4797	4.88889	3687	4.66667	3799	4.66667	3818	4.55556	2828	4.55556	2991	4.55556	2968	4.55556	3176	4.55556	3172	4.55556	2999	4.55556	2770	4.55556	3026	4.55556	3277	4.55556	1966	4.55556	2369	4.55556	2983
													4.77778	3995	4.77778	4408	4.77778	4806	5	3780	4.77778	3775	4.77778	3830	4.66667	2845	4.66667	3021	4.66667	2974	4.66667	3207	4.66667	3078	4.66667	2972	4.66667	2759	4.66667	3112	4.66667	3360	4.66667	2040	4.66667	2529	4.66667	3054
													4.88889	3989	4.88889	4496	4.88889	4851	5.11111	3865	4.88889	3788	4.88889	3831	4.77778	2880	4.77778	3029	4.77778	3030	4.77778	3155	4.77778	3152	4.77778	3007	4.77778	2836	4.77778	3179	4.77778	3369	4.77778	2205	4.77778	2615	4.77778	3154
													5	3947	5	4503	5	4922	5.22222	3892	5	3872	5	3853	4.88889	2814	4.88889	3035	4.88889	3020	4.88889	3248	4.88889	3123	4.88889	3004	4.88889	2876	4.88889	3135	4.88889	3358	4.88889	2308	4.88889	2707	4.88889	3291
													5.11111	3989	5.11111	4567	5.11111	4942	5.33333	3888	5.11111	3908	5.11111	3927	5	2903	5	3065	5	2975	5	3266	5	3164	5	3030	5	2915	5	3125	5	3373	5	2378	5	2887	5	3308
													5.22222	3979	5.22222	4561	5.22222	4943	5.44444	3986	5.22222	3940	5.22222	3906	5.11111	2929	5.11111	3022	5.11111	2995	5.11111	3278	5.11111	3118	5.11111	3035	5.11111	2903	5.11111	3192	5.11111	3353	5.11111	2445	5.11111	2994	5.11111	3354
													5.33333	4041	5.33333	4639	5.33333	5096	5.55556	3978	5.33333	3980	5.33333	4048	5.22222	2886	5.22222	3001	5.22222	3017	5.22222	3243	5.22222	3186	5.22222	3052	5.22222	2897	5.22222	3151	5.22222	3418	5.22222	2573	5.22222	3139	5.22222	3433
													5.44444	4137	5.44444	4558	5.44444	5037	5.66667	4039	5.44444	4065	5.44444	4098	5.33333	2915	5.33333	3060	5.33333	2974	5.33333	3257	5.33333	3158	5.33333	3067	5.33333	3002	5.33333	3234	5.33333	3420	5.33333	2641	5.33333	3224	5.33333	3409
													5.55556	4140	5.55556	4626	5.55556	5002	5.77778	4073	5.55556	4056	5.55556	4051	5.44444	2906	5.44444	3086	5.44444	3063	5.44444	3348	5.44444	3174	5.44444	3049	5.44444	2933	5.44444	3254	5.44444	3484	5.44444	2780	5.44444	3361	5.44444	3485
													5.66667	4095	5.66667	4593	5.66667	5067	5.88889	4122	5.66667	4063	5.66667	4079	5.55556	2868	5.55556	3087	5.55556	2976	5.55556	3324	5.55556	3139	5.55556	3105	5.55556	2923	5.55556	3224	5.55556	3568	5.55556	2822	5.55556	3439	5.55556	3530
													5.77778	4166	5.77778	4699	5.77778	5184	6	4109	5.77778	4163	5.77778	4155							5.66667	3269	5.66667	3108	5.66667	3041	5.66667	2985	5.66667	3281	5.66667	3461	5.66667	2949	5.66667	3450	5.66667	3527
													5.88889	4170	5.88889	4645	5.88889	5127	6.11111	4114	5.88889	4107	5.88889	4206							5.77778	3322	5.77778	3223	5.77778	3046	5.77778	3012	5.77778	3297	5.77778	3550	5.77778	3001	5.77778	3620	5.77778	3513
													6	4169	6	4626	6	5183	6.22222	4208	6	4159	6	4163							5.88889	3303	5.88889	3249	5.88889	3043	5.88889	3045	5.88889	3261	5.88889	3571	5.88889	3082	5.88889	3699	5.88889	3618
													6.11111	4152	6.11111	4706	6.11111	5221	6.33333	4220	6.11111	4145	6.11111	4190							6	3313	6	3219	6	3122	6	3036	6	3291	6	3611	6	3174	6	3715	6	3651
													6.22222	4190	6.22222	4789	6.22222	5202	6.44444	4319	6.22222	4206	6.22222	4316							6.11111	3354	6.11111	3138	6.11111	3094	6.11111	3078	6.11111	3344	6.11111	3551	6.11111	3210	6.11111	3842	6.11111	3717
																			6.55556	4362	6.33333	4224	6.33333	4288							6.22222	3333	6.22222	3258	6.22222	3085	6.22222	3049	6.22222	3290	6.22222	3520	6.22222	3295	6.22222	3918	6.22222	3706
																			6.66667	4322	6.44444	4266	6.44444	4283							6.33333	3356	6.33333	3203	6.33333	3090	6.33333	3108	6.33333	3283	6.33333	3487	6.33333	3411	6.33333	3912	6.33333	3733
																			6.77778	4269	6.55556	4263	6.55556	4306							6.44444	3338	6.44444	3234	6.44444	3108	6.44444	3081	6.44444	3278	6.44444	3553	6.44444	3408	6.44444	3983	6.44444	3686
																			6.88889	4402	6.66667	4300	6.66667	4337							6.55556	3350	6.55556	3245	6.55556	3095	6.55556	3079	6.55556	3290	6.55556	3550	6.55556	3437	6.55556	4016	6.55556	3764
																			7	4413	6.77778	4305	6.77778	4354													6.66667	3119	6.66667	3342	6.66667	3547	6.66667	3501	6.66667	4043	6.66667	3743
																			7.11111	4504	6.88889	4345	6.88889	4474													6.77778	3075	6.77778	3317	6.77778	3603	6.77778	3507	6.77778	4059	6.77778	3746
																			7.22222	4458	7	4364	7	4447													6.88889	3137	6.88889	3367	6.88889	3515	6.88889	3464	6.88889	4062	6.88889	3766
																			7.33333	4462	7.11111	4334	7.11111	4501													7	3074	7	3327	7	3584	7	3605	7	4133	7	3782
																			7.44444	4540	7.22222	4456	7.22222	4499													7.11111	3134	7.11111	3349	7.11111	3646	7.11111	3615	7.11111	4075	7.11111	3843
																			7.55556	4578	7.33333	4432	7.33333	4500													7.22222	3075	7.22222	3334	7.22222	3592	7.22222	3633	7.22222	4184	7.22222	3855
																			7.66667	4593	7.44444	4446	7.44444	4506													7.33333	3152	7.33333	3371	7.33333	3651	7.33333	3619	7.33333	4215	7.33333	3884
																			7.77778	4608	7.55556	4518	7.55556	4590													7.44444	3093	7.44444	3360	7.44444	3618	7.44444	3704	7.44444	4152	7.44444	3962
																			7.88889	4615	7.66667	4489	7.66667	4582													7.55556	3126	7.55556	3388	7.55556	3555	7.55556	3674	7.55556	4200	7.55556	3897
																			8	4666	7.77778	4402	7.77778	4596													7.66667	3176	7.66667	3365	7.66667	3676	7.66667	3756	7.66667	4218	7.66667	3883
																			8.11111	4628	7.88889	4540	7.88889	4654													7.77778	3212	7.77778	3410	7.77778	3705	7.77778	3763	7.77778	4300	7.77778	3968
																			8.22222	4697	8	4615	8	4654													7.88889	3182	7.88889	3410	7.88889	3676	7.88889	3788	7.88889	4208	7.88889	3928
																			8.33333	4723	8.11111	4553	8.11111	4671													8	3195	8	3370	8	3600	8	3828	8	4216	8	3913
																			8.44444	4721	8.22222	4566	8.22222	4658													8.11111	3231	8.11111	3438	8.11111	3654	8.11111	3858	8.11111	4295	8.11111	3916
																			8.55556	4787	8.33333	4560	8.33333	4714																			8.22222	3799	8.22222	4290	8.22222	3977
																			8.66667	4749	8.44444	4621	8.44444	4747																			8.33333	3798	8.33333	4285	8.33333	3943
																			8.77778	4769	8.55556	4703	8.55556	4706																			8.44444	3858	8.44444	4306	8.44444	3953
																			8.88889	4752	8.66667	4625	8.66667	4803																			8.55556	3853	8.55556	4304	8.55556	3928
																			9	4789	8.77778	4694	8.77778	4843																			8.66667	3842	8.66667	4295	8.66667	3878
																			9.11111	4937	8.88889	4670	8.88889	4760																			8.77778	3892	8.77778	4268	8.77778	3900
																			9.22222	4900	9	4655	9	4860																			8.88889	3747	8.88889	4231	8.88889	3961
																			9.33333	4854	9.11111	4650	9.11111	4826																			9	3890	9	4278	9	3895
																					9.22222	4773	9.22222	4910																			9.11111	3845	9.11111	4290	9.11111	3898
																																											9.22222	3793	9.22222	4257	9.22222	3919
																																											9.33333	3824	9.33333	4300	9.33333	3915
																																											9.44444	3872	9.44444	4288	9.44444	3910
																																											9.55556	3787	9.55556	4306	9.55556	3929
																																											9.66667	3876	9.66667	4249	9.66667	3928
																																											9.77778	3830	9.77778	4307	9.77778	3923
																																											9.88889	3846	9.88889	4292	9.88889	3886
	X-34 traces
	S100B-Ca2+ dimer:Abβ2 molar ratios																								Apo-S100B tetramer:Aβ42 molar ratios
	0		0		0		2.5		2.5		2.5		4.2		4.2		4.2		5.8		5.8		5.8		0		0		0		0.1		0.1		0.1		0.25		0.25		0.25		0.5		0.5		0.5
	Time (h)	Fluor.	Time (h)	Fluor.	Time (h)	Fluor.	Time (h)	Fluor.	Time (h)	Fluor.	Time (h)	Fluor.	Time (h)	Fluor.	Time (h)	Fluor.	Time (h)	Fluor.	Time (h)	Fluor.	Time (h)	Fluor.	Time (h)	Fluor.	Time (h)	Fluor.	Time (h)	Fluor.	Time (h)	Fluor.	Time (h)	Fluor.	Time (h)	Fluor.	Time (h)	Fluor.	Time (h)	Fluor.	Time (h)	Fluor.	Time (h)	Fluor.	Time (h)	Fluor.	Time (h)	Fluor.	Time (h)	Fluor.
	0.33333	0	0.44444	0	0.44444	0	0.44444	0	0.44444	0	0.44444	0	0.44444	0	0.44444	0	0.44444	0	0.44444	0	0.44444	0	0.55556	0	0.66667	0	0.55556	0	0.55556	0	0.55556	0	0.55556	0	0.55556	0	0.55556	0	0.55556	0	0.55556	0	0.55556	0	0.55556	0	0.55556	0
	0.44444	-10	0.55556	-11	0.55556	-9	0.55556	-5	0.55556	-6	0.55556	-5	0.55556	-1	0.55556	-4	0.55556	1	0.55556	2	0.55556	-12	0.66667	14	0.77778	-5	0.66667	-9	0.66667	-6	0.66667	-11	0.66667	-21	0.66667	-39	0.66667	-19	0.66667	-45	0.66667	-30	0.66667	-25	0.66667	-11	0.66667	-4
	0.55556	-12	0.66667	-9	0.66667	-13	0.66667	-7	0.66667	4	0.66667	-4	0.66667	2	0.66667	2	0.66667	0	0.66667	5	0.66667	-6	0.77778	15	0.88889	-5	0.77778	-5	0.77778	-11	0.77778	-17	0.77778	-22	0.77778	-32	0.77778	-20	0.77778	-38	0.77778	-31	0.77778	-23	0.77778	-13	0.77778	-5
	0.66667	-8	0.77778	-8	0.77778	-9	0.77778	8	0.77778	13	0.77778	10	0.77778	4	0.77778	1	0.77778	3	0.77778	3	0.77778	-2	0.88889	17	1	7	0.88889	-4	0.88889	-2	0.88889	-9	0.88889	-16	0.88889	-22	0.88889	-12	0.88889	-31	0.88889	-31	0.88889	-19	0.88889	-18	0.88889	-3
	0.77778	3	0.88889	11	0.88889	37	0.88889	48	0.88889	52	0.88889	46	0.88889	16	0.88889	6	0.88889	7	0.88889	5	0.88889	-4	1	16	1.11111	29	1	12	1	9	1	-1	1	1	1	-1	1	-9	1	-29	1	-22	1	-20	1	-20	1	-4
	0.88889	31	1	112	1	238	1	130	1	127	1	131	1	27	1	22	1	21	1	10	1	0	1.11111	18	1.22222	64	1.11111	33	1.11111	46	1.11111	36	1.11111	43	1.11111	29	1.11111	-3	1.11111	-25	1.11111	-24	1.11111	-18	1.11111	-16	1.11111	-4
	1	144	1.11111	358	1.11111	417	1.11111	240	1.11111	236	1.11111	245	1.11111	57	1.11111	56	1.11111	45	1.11111	20	1.11111	4	1.22222	38	1.33333	131	1.22222	85	1.22222	103	1.22222	82	1.22222	93	1.22222	78	1.22222	9	1.22222	-16	1.22222	-15	1.22222	-22	1.22222	-14	1.22222	2
	1.11111	393	1.22222	471	1.22222	452	1.22222	348	1.22222	339	1.22222	349	1.22222	100	1.22222	103	1.22222	87	1.22222	35	1.22222	17	1.33333	47	1.44444	187	1.33333	146	1.33333	167	1.33333	143	1.33333	154	1.33333	135	1.33333	23	1.33333	-8	1.33333	-9	1.33333	-17	1.33333	-18	1.33333	-1
	1.22222	474	1.33333	485	1.33333	455	1.33333	422	1.33333	413	1.33333	418	1.33333	163	1.33333	174	1.33333	151	1.33333	56	1.33333	26	1.44444	83	1.55556	237	1.44444	199	1.44444	221	1.44444	221	1.44444	229	1.44444	211	1.44444	42	1.44444	3	1.44444	0	1.44444	-21	1.44444	-13	1.44444	3
	1.33333	490	1.44444	486	1.44444	452	1.44444	458	1.44444	455	1.44444	462	1.44444	233	1.44444	248	1.44444	229	1.44444	83	1.44444	45	1.55556	125	1.66667	271	1.55556	247	1.55556	248	1.55556	304	1.55556	303	1.55556	280	1.55556	68	1.55556	24	1.55556	13	1.55556	-22	1.55556	-8	1.55556	5
	1.44444	497	1.55556	480	1.55556	455	1.55556	481	1.55556	480	1.55556	477	1.55556	301	1.55556	317	1.55556	305	1.55556	127	1.55556	80	1.66667	178	1.77778	288	1.66667	273	1.66667	262	1.66667	357	1.66667	367	1.66667	351	1.66667	96	1.66667	45	1.66667	34	1.66667	-16	1.66667	4	1.66667	11
	1.55556	481	1.66667	480	1.66667	452	1.66667	495	1.66667	495	1.66667	488	1.66667	358	1.66667	375	1.66667	364	1.66667	181	1.66667	122	1.77778	240	1.88889	306	1.77778	281	1.77778	273	1.77778	406	1.77778	413	1.77778	394	1.77778	131	1.77778	67	1.77778	61	1.77778	-15	1.77778	12	1.77778	20
	1.66667	482	1.77778	483	1.77778	452	1.77778	500	1.77778	498	1.77778	506	1.77778	402	1.77778	408	1.77778	408	1.77778	241	1.77778	182	1.88889	303	2	305	1.88889	287	1.88889	276	1.88889	425	1.88889	446	1.88889	417	1.88889	159	1.88889	99	1.88889	89	1.88889	-16	1.88889	26	1.88889	32
	1.77778	479	1.88889	484	1.88889	448	1.88889	513	1.88889	506	1.88889	505	1.88889	433	1.88889	441	1.88889	435	1.88889	295	1.88889	240	2	352	2.11111	313	2	295	2	277	2	435	2	446	2	448	2	194	2	111	2	121	2	-16	2	44	2	39
	1.88889	484	2	475	2	453	2	511	2	511	2	521	2	460	2	462	2	460	2	349	2	296	2.11111	397	2.22222	315	2.11111	297	2.11111	270	2.11111	442	2.11111	456	2.11111	456	2.11111	223	2.11111	144	2.11111	147	2.11111	-13	2.11111	66	2.11111	54
	2	472	2.11111	474	2.11111	447	2.11111	516	2.11111	511	2.11111	515	2.11111	477	2.11111	475	2.11111	477	2.11111	392	2.11111	349	2.22222	432	2.33333	323	2.22222	309	2.22222	281	2.22222	450	2.22222	473	2.22222	459	2.22222	250	2.22222	180	2.22222	179	2.22222	-7	2.22222	90	2.22222	73
	2.11111	473	2.22222	473	2.22222	447	2.22222	518	2.22222	519	2.22222	523	2.22222	493	2.22222	487	2.22222	484	2.22222	427	2.22222	395	2.33333	453	2.44444	318	2.33333	309	2.33333	287	2.33333	454	2.33333	470	2.33333	468	2.33333	280	2.33333	203	2.33333	204	2.33333	-7	2.33333	115	2.33333	95
	2.22222	480	2.33333	478	2.33333	451	2.33333	521	2.33333	519	2.33333	535	2.33333	500	2.33333	489	2.33333	501	2.33333	450	2.33333	427	2.44444	475	2.55556	314	2.44444	310	2.44444	289	2.44444	464	2.44444	485	2.44444	471	2.44444	304	2.44444	238	2.44444	236	2.44444	0	2.44444	128	2.44444	115
	2.33333	474	2.44444	477	2.44444	448	2.44444	518	2.44444	523	2.44444	537	2.44444	516	2.44444	502	2.44444	508	2.44444	474	2.44444	462	2.55556	493	2.66667	321	2.55556	315	2.55556	291	2.55556	455	2.55556	491	2.55556	479	2.55556	336	2.55556	255	2.55556	265	2.55556	5	2.55556	154	2.55556	134
	2.44444	477	2.55556	477	2.55556	445			2.55556	527	2.55556	539	2.55556	527	2.55556	505	2.55556	518	2.55556	489	2.55556	478	2.66667	507	2.77778	323	2.66667	317	2.66667	283	2.66667	464	2.66667	488	2.66667	483	2.66667	360	2.66667	299	2.66667	300	2.66667	12	2.66667	183	2.66667	154
	2.55556	471	2.66667	482	2.66667	450			2.66667	528	2.66667	540	2.66667	531	2.66667	502	2.66667	522	2.66667	502	2.66667	508	2.77778	519	2.88889	323	2.77778	324	2.77778	295	2.77778	469	2.77778	496	2.77778	492	2.77778	380	2.77778	318	2.77778	318	2.77778	23	2.77778	203	2.77778	176
	2.66667	475											2.77778	537	2.77778	513	2.77778	531	2.77778	517	2.77778	521	2.88889	526	3	329	2.88889	319	2.88889	298	2.88889	467	2.88889	491	2.88889	493	2.88889	407	2.88889	341	2.88889	355	2.88889	35	2.88889	232	2.88889	198
													2.88889	538	2.88889	521	2.88889	519	2.88889	520	2.88889	529	3	526	3.11111	327	3	320	3	295	3	474	3	495	3	485	3	433	3	368	3	381	3	42	3	250	3	220
													3	551	3	525	3	531	3	522	3	550	3.11111	540	3.22222	316	3.11111	329	3.11111	289	3.11111	472	3.11111	502	3.11111	492	3.11111	457	3.11111	384	3.11111	407	3.11111	53	3.11111	274	3.11111	238
													3.11111	544	3.11111	530	3.11111	534	3.11111	535	3.11111	548	3.22222	546	3.33333	328					3.22222	478	3.22222	506	3.22222	500	3.22222	473	3.22222	412	3.22222	427	3.22222	75	3.22222	291	3.22222	269
													3.22222	554	3.22222	523	3.22222	538	3.22222	537	3.22222	568	3.33333	548							3.33333	479	3.33333	513	3.33333	501	3.33333	496	3.33333	435	3.33333	449	3.33333	87	3.33333	318	3.33333	291
													3.33333	556	3.33333	536	3.33333	542	3.33333	551	3.33333	572	3.44444	552							3.44444	481	3.44444	514	3.44444	501	3.44444	511	3.44444	451	3.44444	464	3.44444	104	3.44444	333	3.44444	314
													3.44444	558	3.44444	533	3.44444	549	3.44444	557	3.44444	575	3.55556	548													3.55556	525	3.55556	467	3.55556	486	3.55556	121	3.55556	364	3.55556	333
													3.55556	557	3.55556	535	3.55556	548	3.55556	561	3.55556	582	3.66667	559													3.66667	543	3.66667	484	3.66667	516	3.66667	141	3.66667	364	3.66667	354
													3.66667	566	3.66667	540	3.66667	549	3.66667	565	3.66667	585	3.77778	557													3.77778	557	3.77778	498	3.77778	520	3.77778	157	3.77778	383	3.77778	371
													3.77778	569	3.77778	547	3.77778	551	3.77778	567	3.77778	589	3.88889	561													3.88889	561	3.88889	503	3.88889	541	3.88889	174	3.88889	401	3.88889	383
													3.88889	577	3.88889	548	3.88889	562	3.88889	574	3.88889	601	4	565													4	572	4	502	4	555	4	201	4	420	4	397
													4	580	4	555	4	564	4	578	4	605	4.11111	567													4.11111	557	4.11111	514	4.11111	562	4.11111	219	4.11111	427	4.11111	405
													4.11111	584	4.11111	556	4.11111	566	4.11111	579	4.11111	608	4.22222	567													4.22222	585	4.22222	514	4.22222	568	4.22222	224	4.22222	433	4.22222	420
													4.22222	582	4.22222	564	4.22222	559	4.22222	583	4.22222	617	4.33333	570													4.33333	582	4.33333	518	4.33333	572	4.33333	244	4.33333	450	4.33333	431
													4.33333	591	4.33333	570	4.33333	572	4.33333	588	4.33333	613	4.44444	565													4.44444	592	4.44444	530	4.44444	576	4.44444	264	4.44444	465	4.44444	447
													4.44444	585	4.44444	563	4.44444	562	4.44444	591	4.44444	626	4.55556	565													4.55556	582	4.55556	525	4.55556	585	4.55556	272	4.55556	473	4.55556	469
													4.55556	603	4.55556	572	4.55556	570	4.55556	595	4.55556	622	4.66667	575													4.66667	579	4.66667	526	4.66667	585	4.66667	289	4.66667	491	4.66667	477
													4.66667	595	4.66667	568	4.66667	568	4.66667	599	4.66667	625	4.77778	577													4.77778	577	4.77778	522	4.77778	585	4.77778	301	4.77778	499	4.77778	487
													4.77778	597	4.77778	563	4.77778	578	4.77778	599			4.88889	576													4.88889	585	4.88889	524	4.88889	581	4.88889	320	4.88889	496	4.88889	497
													4.88889	603	4.88889	562	4.88889	579					5	581													5	589	5	537	5	583	5	337	5	504	5	508
																							5.11111	577													5.11111	585	5.11111	535	5.11111	585	5.11111	339	5.11111	511	5.11111	515
																							5.22222	592													5.22222	581	5.22222	531	5.22222	593	5.22222	355	5.22222	520	5.22222	523
																							5.33333	584													5.33333	585	5.33333	526	5.33333	597	5.33333	363	5.33333	530	5.33333	538
																																					5.44444	592	5.44444	536	5.44444	582	5.44444	374	5.44444	534	5.44444	544
																																					5.55556	589	5.55556	544	5.55556	594	5.55556	387	5.55556	540	5.55556	554
																																					5.66667	576	5.66667	533	5.66667	592	5.66667	396	5.66667	537	5.66667	552
																																					5.77778	589	5.77778	532	5.77778	586	5.77778	397	5.77778	542	5.77778	559
																																					5.88889	579	5.88889	536	5.88889	596	5.88889	406	5.88889	542	5.88889	560
																																											6	416	6	531	6	568
																																											6.11111	429	6.11111	535	6.11111	568
																																											6.22222	430	6.22222	553	6.22222	569
																																											6.33333	434	6.33333	546	6.33333	580
																																											6.44444	446	6.44444	559	6.44444	584
																																											6.55556	439	6.55556	566	6.55556	586
																																											6.66667	453	6.66667	580	6.66667	582
																																											6.77778	454	6.77778	557	6.77778	582
																																											6.88889	460	6.88889	575	6.88889	588
																																											7	458	7	579	7	588
																																											7.11111	457	7.11111	557	7.11111	589
																																											7.22222	472	7.22222	564	7.22222	589
																																											7.33333	472	7.33333	564	7.33333	600
																																											7.44444	471	7.44444	553	7.44444	595
																																											7.55556	478	7.55556	561	7.55556	594
